# Supplementary material for: Usability assessment of point-of-care diagnostics for infectious diseases in low-resource settings: a scoping review of current practices
Source: Research Square preprint supplement (doi:10.21203/rs.3.rs-8221943/v1), 2026-01-12
Supplement: Supplementary file 1 [file 1bc0b71e01bc95ab94b2627c.docx]

**Supplementary tables and figures**

Table of Contents

[Fig S1. Timeline of included studies with number and type of tests. A study may include more than one test. 1](#_Toc215139700)

[Fig S2. Reported usability outcomes by type of test (self-testing and POC) 2](#_Toc215139701)

[Supplementary Table S1. Detailed search terms used in the different databases 2](#_Toc215139702)

[Supplementary Table S2. Product dossier and usability information available in regulatory agency, non-profit and public-private initiative websites 12](#_Toc215139703)

[Supplementary Table S3. Reported usability outcomes by type of test (self-testing and POC) 13](#_Toc215139704)

[Supplementary Table S4. Characteristics, tests and usability outcomes of included product dossiers. 13](#_Toc215139705)

[Supplementary Table S5. List of included studies 18](#_Toc215139706)

# **Fig S1.** Timeline of included studies with number and type of tests. A study may include more than one test.

**
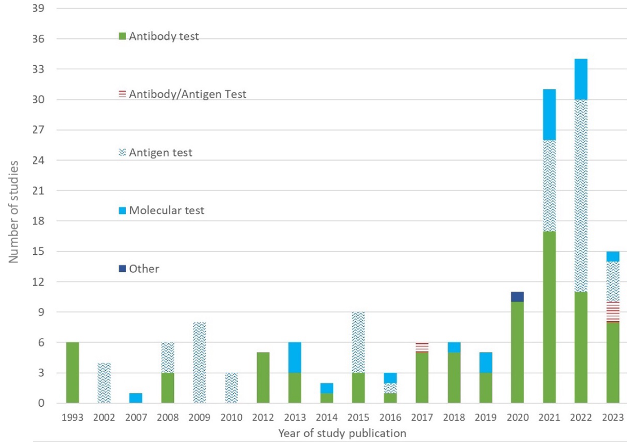
**

# **Fig S2.** Reported usability outcomes by type of test (self-testing and POC)

**
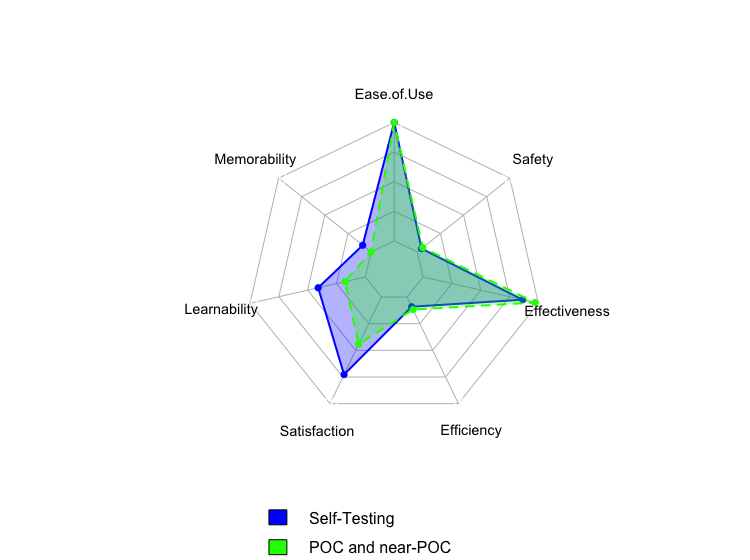
**

This radar plot illustrates the relative frequency of seven usability outcome domains reported in studies evaluating diagnostic tests. Raw counts were extracted for each domain by use setting and normalized within group (maximum = 10) to allow visual comparison. While ease of use and effectiveness were frequently reported across both settings, outcomes such as safety, memorability, and satisfaction were less commonly assessed.

# **Supplementary Table S1.** Detailed search terms used in the different databases

**Table S1-A.** Search strategy used for PubMed/MEDLINE according to the PCC question

| **Component of the search strategy (PCC question)** | | **Search terms** |
| --- | --- | --- |
| **Population** | Healthcare providers with minimal to superior training (e.g., community health workers/field agents, laboratory technicians, etc.) | Not included as part of the search strategy |
| **Concept** | 1. Infectious diseases | "Tuberculosis"[Mesh] OR  Tuberculo*[tw] OR  TB[tw] OR  "Malaria"[Mesh] OR  malaria[tw] OR  "HIV"[Mesh] OR  "Acquired Immunodeficiency Syndrome"[Mesh] OR  hiv[tw] OR  aids[tw] OR  "lower respiratory infection*"[tw] OR  "Diarrhea"[Mesh] OR  diarrhoea[tw] OR  "Buruli Ulcer"[Mesh] OR  "Buruli ulcer"[tw] OR  "Chagas Disease"[Mesh] OR  "Chagas disease"[tw] OR  "Dengue"[Mesh] OR  dengue[tw] OR  "Chikungunya Fever"[Mesh] OR  "Chikungunya virus"[Mesh] OR  chikungunya[tw] OR  "Dracunculiasis"[Mesh] OR  dracunculiasis[tw] OR  echinococcus*[tw] OR  "Foodborne Diseases"[Mesh] OR  Foodborne[tw] OR  "Food borne"[tw] OR  "Trypanosomiasis, African"[Mesh] OR  "African Trypanosomias*"[tw] OR  "African Sleeping Sickness*"[tw] OR  Nagana[tw] OR  "Leishmaniasis"[Mesh] OR  leishmanias*[tw] OR  "Leprosy"[Mesh] OR  leprosy[tw] OR  "Elephantiasis, Filarial"[Mesh] OR  "lymphatic filarias*"[tw] OR  "Mycetoma"[Mesh] OR  mycetoma[tw] OR  "Chromoblastomycosis"[Mesh] OR  chromoblastomycos*[tw] OR  "Onchocerciasis"[Mesh] OR  onchocercias*[tw] OR  "Rabies"[Mesh] OR  rabies[tw] OR  "Scabies"[Mesh] OR  scabies[tw] OR  "Schistosomiasis"[Mesh] OR  schistosomias*[tw] OR  "Taeniasis"[Mesh] OR  taenias*[tw] OR  "Cysticercosis"[Mesh] OR  cysticercos*[tw] OR  "Trachoma"[Mesh] OR  trachoma[tw] OR  "Yaws"[Mesh] OR  yaws[tw] OR  "Coronavirus"[Mesh] OR  "COVID-19"[Mesh] OR  covid*[tw] OR  coronavirus*[tw] OR  corona virus*[tw] OR  ncov*[tw] OR  "n cov*"[tw] OR  "Severe Acute Respiratory Syndrome"[tw] OR  sars*[tw] OR  "2019ncov*"[tw] OR  "2019 ncov*"[tw] OR  "Vector Borne Diseases"[Mesh] OR  "Vector Borne"[tw] OR  VectorBorne[tw] OR  "Crimean Congo hemorrhagic"[tw] OR  "congo virus*"[tw] OR  CCHF[tw] OR  "Ebolavirus"[Mesh] OR  ebola*[tw] OR  "Marburg Virus Disease"[Mesh] OR  "marburg virus*"[tw] OR  marburgvirus*[tw] OR  "Lassa virus"[Mesh] OR  "lassa virus*"[tw] OR  lassavirus*[tw] OR  "lassa fever*"[tw] OR  lassafever*[tw] OR  "Middle East Respiratory Syndrome Coronavirus"[Mesh] OR  "middle east respiratory syndrome"[tw] OR  mers[tw] OR  "Nipah Virus"[Mesh] OR  Nipah[tw] OR  henipavir*[tw] OR  "Rift Valley Fever"[Mesh] OR  "rift valley"[tw] OR  RVF[tw] OR  "Zika Virus"[Mesh] OR  "Zika"[tw] OR  "Helminthiasis"[Mesh] OR  Helminthias*[tw] OR  Nematomorpha[tw] OR  "Hookworm Infections"[Mesh] OR  Hookworm[tw] OR  Bunostomias*[tw] OR  "Trichuriasis"[Mesh] OR  Trichurias*[tw] OR  Trichuris*[tw] OR  Trichocephalias*[tw] OR  Whipworm[tw] OR  "Strongyloides stercoralis"[Mesh] OR  "Strongyloides stercorali*"[tw] OR  "Ascaris lumbricoides"[Mesh] OR  "Ascariasis"[Mesh] OR  Ascaris*[tw] OR  Ascarias*[tw] OR  "Ectoparasitic Infestations"[Mesh] OR  "Ectoparasitic Infestation*"[tw] OR  "Sporotrichosis"[Mesh] OR  Sporotrichos*[tw] OR  Sporothrix[tw] OR  "Paracoccidioidomycosis"[Mesh] OR  "Paracoccidioides Infection"[tiab:~3] OR  "Paracoccidioides Infections"[tiab:~3] OR  "Blastomyces Infections"[tiab:~3] OR  "Blastomyces Infection"[tiab:~3] OR  "Paracoccidioidal Granuloma*"[tw] OR  Paracoccidioidomycos*[tw] OR  "South American Blastomycos*"[tw] |
| 1. POC testing, self testing, near-patient, Rapid Diagnostic Tests | "Point-of-Care Testing"[Mesh] OR  "Point Of Care"[tw] OR  "Bedside Test*"[tw] OR  "Self-Testing"[Mesh] OR  "Self Test*"[tw] OR  Selftest*[tw] OR  "Point-of-Care Testing"[Mesh] OR  (("point of care*"[tw] OR  “near patient”[tw] OR  "bedside*"[tw] OR  "rapid*"[tw] OR  "in vitro"[tw])  AND  ("test*"[tw] OR  "diagnos*"[tw])) |
| 1. Type of test: Molecular and antigen-based diagnostic with/without automated component for generation of result and/or result interpretation | "Molecular Diagnostic Techniques"[Mesh] OR  "Molecular Diagnos*"[tw] OR  "Molecular Test*"[tw] OR  "Rapid Diagnostic Tests"[Mesh] OR  "Direct-To-Consumer Screening and Testing"[Mesh]OR  Antigen*[tw] OR  "Lateral flow*"[tw] OR  RDT[tw] OR  ((Rapid*[tw] OR  "direct to consumer*"[tw])  AND  (Screen*[tw] OR  Test*[tw] OR  diagnos*[tw])) OR  "Nucleic Acid Amplification Techniques"[Mesh] OR  "Nucleic Acid Amplification"[tiab] OR  "Enzyme Linked Immunosorbent Assay"[Mesh] OR  "Enzyme Linked Immunosorbent Assay"[tiab] OR  ELISA[tiab] OR  "Polymerase Chain Reaction"[Mesh] OR  "Polymerase Chain Reaction"[tiab] OR  PCR[tiab] OR  "Hybridization"[tiab] OR  "Dipstick Test"[tiab] OR  "Lateral Flow Assay"[tiab] OR  "Microfluidic Bioassay"[tiab] OR  "Cross Priming Amplification"[tiab] OR  CPA[tiab] OR  "Isothermal Amplification"[tiab] OR  "Exponential Amplification Reaction"[tiab] OR  EXPAR[tiab] OR  "Helicase Dependent Amplification"[tiab] OR  HDA[tiab] OR  "Loop Mediated Isothermal Amplification"[tiab] OR  LAMP[tiab] OR  "Nicking Endonuclease"[tiab] OR  NEAR[tiab] OR  NEAA[tiab] OR  "Nucleic Acid Sequence Based Amplification"[tiab] OR  NASBA[tiab] OR  "Polymerase Spiral Reaction"[tiab] OR  PSR[tiab] OR  "Ramification Amplification"[tiab] OR  RAM[tiab] OR  "Recombinase Polymerase Amplification"[tiab] OR  RPA[tiab] OR  "Rolling Circle Amplification"[tiab] OR  RCA[tiab] OR  SMART[tiab] OR  "Strand Displacement Amplification"[tiab] OR  SDA[tiab] OR  "Strand Invasion Based Amplification"[tiab] OR  SIBA[tiab] OR  "Transcription Mediated Amplification"[tiab] OR  TMA[tiab] OR  dPCR[tiab] OR  ddPCR[tiab] OR  qPCR[tiab] OR  CISH[tiab] OR  FISH[tiab] OR  "Line Probe Assay"[tiab] OR  LiPA[tiab] OR  CATCH[tiab] |
| 1. Usability | "User-Centered Design"[Mesh] OR  “ease of use"[tw] OR  "User Centered Design*"[tw] OR  "human factor*"[tw] OR  "Formative evaluation*"[tw] OR  Usability[tw] OR  "user experience"[tw] OR  "user satisfaction"[tw] |
| **Context** | Low levels of health system in LMICs | Not included as part of the search strategy |

**Table S1-B.** Search terms used in the databases included in the scoping review.

The search terms were adapted as necessary for the different databases in the scoping review.

| **CODE** | **Main aspects definition** | **Search Terms** |
| --- | --- | --- |
| 1.P | infectious diseases | **"Communicable Diseases"[Mesh] OR**  ((Communicable[tw] OR  infect*[tw] OR  contagio*[tw])  AND  (Disease*[tw] OR  condition*[tw] OR  disorder*[tw])) OR |
| **"Tuberculosis"[Mesh] OR**  Tuberculo*[tw] OR  TB[tw] OR  "Malaria"[Mesh] OR  malaria[tw] OR  "HIV"[Mesh] OR  "Acquired Immunodeficiency Syndrome"[Mesh] OR  hiv[tw] OR  aids[tw] OR  "lower respiratory infection*"[tw] OR  "Diarrhea"[Mesh] OR  diarrhoea[tw] OR |
| "Buruli Ulcer"[Mesh] OR  "Buruli ulcer"[tw] OR  "Chagas Disease"[Mesh] OR  "Chagas disease"[tw] OR  "Dengue"[Mesh] OR  dengue[tw] OR  "Chikungunya Fever"[Mesh] OR  "Chikungunya virus"[Mesh] OR  chikungunya[tw] OR  "Dracunculiasis"[Mesh] OR  dracunculiasis[tw] OR  "Dracunculiasis"[Mesh] OR  echinococcus*[tw] OR  "Foodborne Diseases"[Mesh] OR  Foodborne[tw] OR  "Food borne"[tw] OR  "Trypanosomiasis, African"[Mesh] OR  "Leishmaniasis"[Mesh] OR  leishmanias*[tw] OR  "Leprosy"[Mesh] OR  leprosy[tw] OR  "Elephantiasis, Filarial"[Mesh] OR  "lymphatic filarias*"[tw] OR  "Mycetoma"[Mesh] OR  mycetoma[tw] OR  "Chromoblastomycosis"[Mesh] OR  chromoblastomycos*[tw] OR  "Onchocerciasis"[Mesh] OR  onchocercias*[tw] OR  "Rabies"[Mesh] OR  rabies[tw] OR  "Scabies"[Mesh] OR  scabies[tw] OR  "Schistosomiasis"[Mesh] OR  schistosomias*[tw] OR  "Taeniasis"[Mesh] OR  taenias*[tw] OR  "Cysticercosis"[Mesh] OR  cysticercos*[tw] OR  "Trachoma"[Mesh] OR  trachoma[tw] OR  "Yaws"[Mesh] OR  yaws[tw] OR |
| "Coronavirus"[Mesh] OR  "COVID-19"[Mesh] OR  covid*[tw] OR  coronavirus*[tw] OR  corona virus*[tw] OR  ncov*[tw] OR  "n cov*"[tw] OR  "Severe Acute Respiratory Syndrome"[tw] OR  sars*[tw] OR  "2019ncov*"[tw] OR  "2019 ncov*"[tw] OR  "Crimean Congo hemorrhagic"[tw] OR  "congo virus*"[tw] OR  CCHF[tw] OR  "Ebolavirus"[Mesh] OR  ebola*[tw] OR  "Marburg Virus Disease"[Mesh] OR  "marburg virus*"[tw] OR  marburgvirus*[tw] OR  "Lassa virus"[Mesh] OR  "lassa virus*"[tw] OR  lassavirus*[tw] OR  "lassa fever*"[tw] OR  lassafever*[tw] OR  "Middle East Respiratory Syndrome Coronavirus"[Mesh] OR  "middle east respiratory syndrome"[tw] OR  mers[tw] OR  "Nipah Virus"[Mesh] OR  Nipah[tw] OR  henipavir*[tw] OR  "Rift Valley Fever"[Mesh] OR  "rift valley"[tw] OR  RVF[tw] OR  "Zika Virus"[Mesh] OR  "Zika"[tw] OR  "Helminthiasis"[Mesh] OR  Helminthias*[tw] OR  Nematomorpha[tw] OR  "Hookworm Infections"[Mesh] OR  Hookworm[tw] OR  Bunostomias*[tw] OR  "Trichuriasis"[Mesh] OR  Trichurias*[tw] OR  Trichuris*[tw] OR  Trichocephalias*[tw] OR  Whipworm[tw] OR  "Strongyloides stercoralis"[Mesh] OR  "Strongyloides stercorali*"[tw] OR  "Ascaris lumbricoides"[Mesh] OR  "Ascariasis"[Mesh] OR  Ascaris*[tw] OR  Ascarias*[tw] OR  "Ectoparasitic Infestations"[Mesh] OR  "Ectoparasitic Infestation*"[tw] OR  "Sporotrichosis"[Mesh] OR  Sporotrichos*[tw] OR  Sporothrix[tw] OR  "Paracoccidioidomycosis"[Mesh] OR  "Paracoccidioides Infection"[tiab:~3] OR  "Paracoccidioides Infections"[tiab:~3] OR  "Blastomyces Infections"[tiab:~3] OR  "Blastomyces Infection"[tiab:~3] OR  "Paracoccidioidal Granuloma*"[tw] OR  Paracoccidioidomycos*[tw] OR  "South American Blastomycos*"[tw] |

| **CODE** | **Main aspects definition** | **Search Terms** |
| --- | --- | --- |
| 2.I | molecular and antigen diagnostic | "Molecular Diagnostic Techniques"[Mesh] OR  "Molecular Diagnos*"[tw] OR  "Molecular Test*"[tw] OR  ("Nucleic Acid Amplification Techniques"[MeSH Terms] OR "Nucleic Acid Amplification"[Title/Abstract] OR "Enzyme Linked Immunosorbent Assay"[MeSH Terms] OR "Enzyme Linked Immunosorbent Assay"[Title/Abstract] OR "ELISA"[Title/Abstract] OR "Polymerase Chain Reaction"[MeSH Terms] OR "Polymerase Chain Reaction"[Title/Abstract] OR "PCR"[Title/Abstract] OR "Hybridization"[Title/Abstract] OR "Dipstick Test"[Title/Abstract] OR "Lateral Flow Assay"[Title/Abstract] OR "Microfluidic Bioassay"[Title/Abstract] OR "Cross Priming Amplification"[Title/Abstract] OR "CPA"[Title/Abstract] OR "Isothermal Amplification"[Title/Abstract] OR "Exponential Amplification Reaction"[Title/Abstract] OR "EXPAR"[Title/Abstract] OR "Helicase Dependent Amplification"[Title/Abstract] OR "HDA"[Title/Abstract] OR "Loop Mediated Isothermal Amplification"[Title/Abstract] OR "LAMP"[Title/Abstract] OR "Nicking Endonuclease"[Title/Abstract] OR "NEAR"[Title/Abstract] OR "NEAA"[Title/Abstract] OR "Nucleic Acid Sequence Based Amplification"[Title/Abstract] OR "NASBA"[Title/Abstract] OR "Polymerase Spiral Reaction"[Title/Abstract] OR "PSR"[Title/Abstract] OR "Ramification Amplification"[Title/Abstract] OR "RAM"[Title/Abstract] OR "Recombinase Polymerase Amplification"[Title/Abstract] OR "RPA"[Title/Abstract] OR "Rolling Circle Amplification"[Title/Abstract] OR "RCA"[Title/Abstract] OR "SMART"[Title/Abstract] OR "Strand Displacement Amplification"[Title/Abstract] OR "SDA"[Title/Abstract] OR "Strand Invasion Based Amplification"[Title/Abstract] OR "SIBA"[Title/Abstract] OR "Transcription Mediated Amplification"[Title/Abstract] OR "TMA"[Title/Abstract] OR "Digital PCR"[Title/Abstract] OR "dPCR"[Title/Abstract] OR "d PCR"[Title/Abstract] OR "Droplet Based Digital PCR"[Title/Abstract] OR "ddPCR"[Title/Abstract] OR "dd PCR"[Title/Abstract] OR "Endpoint PCR"[Title/Abstract] OR "Nested PCR"[Title/Abstract] OR "Quantitative Real-Time PCR"[Title/Abstract] OR "qPCR"[Title/Abstract] OR "q PCR"[Title/Abstract] OR "CISH"[Title/Abstract] OR "FISH"[Title/Abstract] OR "Line Probe Assay"[Title/Abstract] OR "LiPA"[Title/Abstract] OR "CATCH"[Title/Abstract]) |
|  |  | "Rapid Diagnostic Tests"[Mesh] OR  "Direct-To-Consumer Screening and Testing"[Mesh]OR  Antigen*[tw] OR  "Lateral flow*"[tw] OR  RDT[tw] OR  ((Rapid*[tw] OR  "direct to consumer*"[tw])  AND  (Screen*[tw] OR  Test*[tw] OR  diagnos*[tw])) |

| **CODE** | **Main aspects definition** | **Search Terms** |
| --- | --- | --- |
| 3. X | point-of-care (POC) | "Point-of-Care Testing"[Mesh] OR  "Point Of Care"[tw] OR  "Bedside Test*"[tw] OR |
| "Self-Testing"[Mesh] OR  "Self Test*"[tw] OR  Selftest*[tw] OR |
| "Point-of-Care Testing"[Mesh] OR  (("point of care*"[tw] OR  “near patient”[tw] OR  "bedside*"[tw] OR  "rapid*"[tw] OR  "in vitro"[tw])  AND  ("test*"[tw] OR  "diagnos*"[tw])) |

| **CODE** | **Main aspects definition** | **Search Terms** |
| --- | --- | --- |
| 4. Y | Usability | "User-Centered Design"[Mesh] OR  “ease of use"[tw] OR  "User Centered Design*"[tw] OR  "human factor*"[tw] OR  "Formative evaluation*"[tw] OR  Usability[tw] |

**Table S1-C.** Search terms used in the grey literature databases included in the scoping review.

| **Database** | **Search strategy** |
| --- | --- |
| **WHO IRIS** | "Communicable Diseases" AND "User-Centered Design" OR "ease of use" OR “Usability” AND "Molecular Diagnostic Techniques" OR "molecular test*"OR "Rapid Diagnostic Tests" AND “Point-of-Care Testing" OR "Self-Testing"  ("Communicable Diseases" OR “disease*" OR "condition*") AND "User-Centered Design" OR "ease of use" OR “Usability” AND "Molecular Diagnostic Techniques" "molecular test*"OR "Rapid Diagnostic Tests" OR “Point-of-Care Testing" OR "Self-Testing" |
| **EBSCO** | "Communicable Diseases" AND "User-Centered Design" OR "ease of use" OR “Usability” AND "Molecular Diagnostic Techniques" OR "molecular test*"OR "Rapid Diagnostic Tests" AND “Point-of-Care Testing" OR "Self-Testing"  ("Communicable Diseases" OR “disease*" OR "condition*") AND "User-Centered Design" OR "ease of use" OR “Usability” AND "Molecular Diagnostic Techniques" "molecular test*"OR "Rapid Diagnostic Tests" OR “Point-of-Care Testing" OR "Self-Testing"  (Communicable OR infect* OR contagio*) AND (Disease* OR condition* OR disorder*) AND "molecular test"OR "Rapid Diagnostic Tests" OR "self test" OR "selftest" AND "user centered design" OR "human factor" OR "formative evaluation" OR "user experience" OR "user satisfaction" |
| **PAHO IRIS** | "Communicable Diseases" AND "Molecular Diagnostic Techniques" OR "molecular test*"OR "Rapid Diagnostic Tests" OR “Point-of-Care Testing" OR "Self-Testing" AND "User-Centered Design" OR "ease of use" OR “Usability”  "Communicable Diseases" OR “disease*" OR "condition*" AND "Molecular Diagnostic Techniques" "molecular test*"OR "Rapid Diagnostic Tests" OR “Point-of-Care Testing" OR "Self-Testing" AND "User-Centered Design" OR "ease of use" OR “Usability”  "Communicable" OR "infect*"OR "contagio*" OR "disorder*" AND "molecular test*"OR "Rapid Diagnostic Tests" OR "self test*" OR "selftest*" AND "user centered design*" OR "human factor*" OR "formative evaluation*" OR "user experience" OR "user satisfaction" |
| **Google Scholar** | "Communicable Diseases" AND "Molecular Diagnostic Techniques" OR "molecular test*"OR "Rapid Diagnostic Tests" OR “Point-of-Care Testing" OR "Self-Testing" AND "User-Centered Design" OR "ease of use" OR “Usability”  "Communicable Diseases" OR “disease*" OR "condition*" AND "Molecular Diagnostic Techniques" "molecular test*"OR "Rapid Diagnostic Tests" OR “Point-of-Care Testing" OR "Self-Testing" AND "User-Centered Design" OR "ease of use" OR “Usability”  "Communicable" OR "infect*"OR "contagio*" OR "disorder*" AND "molecular test*"OR "Rapid Diagnostic Tests" OR "self test*" OR "selftest*" AND "user centered design*" OR "human factor*" OR "formative evaluation*" OR "user experience" OR "user satisfaction" |
| **LILACS** | "Communicable Diseases" AND "Molecular Diagnostic Techniques" OR "molecular test*"OR "Rapid Diagnostic Tests" OR “Point-of-Care Testing" OR "Self-Testing" AND "User-Centered Design" OR "ease of use" OR “Usability”  "Communicable Diseases" OR “disease*" OR "condition*" AND "Molecular Diagnostic Techniques" "molecular test*"OR "Rapid Diagnostic Tests" OR “Point-of-Care Testing" OR "Self-Testing" AND "User-Centered Design" OR "ease of use" OR “Usability”  "Communicable" OR "infect*"OR "contagio*" OR "disorder*" AND "molecular test*"OR "Rapid Diagnostic Tests" OR "self test*" OR "selftest*" AND "user centered design*" OR "human factor*" OR "formative evaluation*" OR "user experience" OR "user satisfaction" |

# **Supplementary Table S2.** Product dossier and usability information available in regulatory agency, non-profit and public-private initiative websites

| Source | Website URL | Product dossier publicly available (yes/no) | Usability information reported in the dossier (yes/no/not applicable) |
| --- | --- | --- | --- |
| 1. U.S. Food and Drug Administration (FDA) Tables of In Vitro Diagnostics Emergency Use Authorizations | <https://www.fda.gov/medical-devices/coronavirus-disease-2019-covid-19-emergency-use-authorizations-medical-devices/in-vitro-diagnostics-euas> | Yes | No |
| 1. EUDAMED - European Database on Medical Devices | <https://ec.europa.eu/tools/eudamed/#/screen/search-device> | Yes | No |
| 1. MFDS - Republic of Korea’s Ministry of Food and Drug Safety (MFDS) | <https://www.mfds.go.kr/eng/brd/m_41/list.do> | Yes | No |
| 1. MDALL - Health Canada Medical Devices Active Licence Listing | <https://health-products.canada.ca/mdall-limh/index-eng.jsp> | No | Not applicable (no dossier publicly available) |
| 1. CDSCO - Government of India, Central Drugs Standard Control Organization | <https://cdsco.gov.in/opencms/opencms/en/Medical-Device-Diagnostics/InVitro-Diagnostics/> | No | Not applicable (no dossier publicly available) |
| 1. Johns Hopkins Centre for Health Security Antigen and Molecular-based Tests Tracker | <https://www.centerforhealthsecurity.org/covid-19TestingToolkit/molecular-based-tests/current-molecular-and-antigen-tests.html> | Yes | Variable. After in initial search of 15 dossiers, this dataset was dropped, because most documents did not contain usability information. |
| 1. WHO. List of WHO-prequalified In Vitro Diagnostic products | <https://extranet.who.int/pqweb/vitro-diagnostics/vitro-diagnostics-lists> | Yes | Yes |

# **Supplementary Table S3.** Reported usability outcomes by type of test (self-testing and POC)

| **Intended use setting** | **Ease of Use** | **Memorability** | **Learnability** | **Satisfaction** | **Efficiency** | **Effectiveness** | **Safety** |
| --- | --- | --- | --- | --- | --- | --- | --- |
| **Self-Testing** | - Perceived ease of use - Ease of result interpretation - Frequency of errors | - Understanding of test instructions - Confidence in performing test tasks over time | - Perceived ability to use the test independently (self-efficacy) - Comprehension of instructions | - User perceptions of test features - Confidence in results - Willingness to reuse or recommend - Qualitative assessments of testing experience | - Time taken to complete tasks - Ability to follow testing steps - Observed challenges | - Test performance - Inter-rater reliability - Agreement between professional and lay users - Successful completion of tasks | - Observed adverse events - User errors in result interpretation |
| **Point-of-Care (POC)** | - Perceived ease of use - Perception of test fit to clinical practice | - Training needs - Retention of information - Ability to perform test tasks post-training | - Observed ability to perform test tasks - Ease of learning - Effectiveness of training | - Qualitative assessment of test advantages/ disadvantages - Perceived end-user satisfaction - Willingness to reuse or recommend | - Time to complete tasks - Turnaround times - Resource use (e.g., consumables, PPE) | - Test performance - Proportion of invalid tests - Inter-rater reliability - Agreement between professional and lay users | - Perceived risks in sample handling, contamination - Observed adverse events |

# **Supplementary Table S4.** Characteristics, tests and usability outcomes of included product dossiers.

| **Dossier ID** | **Name of the test** | **Listing date** | **Type of test** | **Test developer** | **Intended use setting** | **Usability outcome reported** | **Sample size for usability evaluation** |
| --- | --- | --- | --- | --- | --- | --- | --- |
| PQDx 0458-072-00 | SAMBA II HIV-1 Qual Whole Blood Test | 19.07.23 | Molecular test | Diagnostics for the Real World Ltd | Level 0 (L0) - Community, Level 1 (L1) - Primary Care | Ease of use | Not available |
| PQDx 0485-013-00 | Determine Syphilis TP | 22.12.22 | Antibody test | Abbott Diagnostics Medical Co., Ltd | Level 1 (L1) - Primary Care | Ease of use | Not available |
| PQDx 0453-070-00 | Xpert HCV VL Fingerstick | 05.12.22 | Molecular test | Cepheid AB | Level 1 (L1) - Primary Care | Ease of use | Not available |
| PQDx 0480-032-00 | Panbio HIV Verification Test | 21.11.22 | Antibody test | Abbott Rapid Diagnostics Jena GmbH | Level 1 (L1) - Primary Care, Level 2 (L2) - District Hospital Lab | Ease of use | Not available |
| PQDx 0470-074-00 | MERISCREEN Malaria Pf HRP-II Ag | 15.11.22 | Antigen test | Meril Diagnostics Pvt. Ltd. | Level 0 (L0) - Community; Level 1 (L1) - Primary Care | Ease of use | Not available |
| PQDx 0357-004-01 | Wondfo HIV Self-Test | 13.07.22 | Antibody test | Guangzhou Wondfo Biotech Co., Ltd. | Self-Testing | Not available | Not available |
| PQDx 0481-032-00 | CheckNOW HIV SELF TEST | 04.04.22 | Antibody test | Abbott Rapid Diagnostics Jena GmbH | Self-Testing | Ease of use | Not available |
| PQDx 0473-052-00 | TrinScreen HIV | 09.02.22 | Antibody test | Trinity Biotech Manufacturing Ltd. | Level 0 (L0) - Community; Level 1 (L1) - Primary Care | Ease of use | Not available |
| PQDx 0464-074-00 | MERISCREEN HIV 1-2 WB | 24.09.20 | Antibody test | Meril Diagnostics Pvt. Ltd. | Laboratory/Point-of-Care Level 0 (L0) - Community; Level 1 (L1) | Ease of use | Not available |
| PQDx 0321-024-00 | Paracheck Pf - Rapid Test for P. Falciparum Malaria Device (Ver. 3) | 14.09.20 | Antigen test | Orchid Biomedical Systems | Clinical setup/Point of care Level 0 (L0) - Community; Level 1 (L1) | Ease of use | Not available |
| PQDx 0330-074-00 | One Step test for Malaria Pf/Pan Ag MERISCREEN Malaria Pf/Pan Ag | 25.08.20 | Antigen test | Meril Diagnostics Pvt. Ltd. | Level 0 (L0) - Community; Level 1 (L1) | Ease of use | Not available |
| PQDx 0384-077-00 | VISITECT CD4 Advanced Disease | 20.08.20 | Other (CD4 count) | AccuBio Ltd. | Level 0 (L0) - Community; Level 1 (L1) | Ease of use | Not available |
| PQDx 0383-117-00 | STANDARD Q HIV 1/2 Ab 3-Line Test | 10.06.20 | Antibody test | SD Biosensor, Inc. | Laboratory/Point-of-Care Level 0 (L0) - Community; Level 1 (L1) | Ease of use | Not available |
| PQDx 0291-025-00 | Parascreen - Rapid test for Malaria Pan/Pf | 03.06.20 | Antigen test | Zephyr Biomedicals - A Division of Tulip Diagnostics (P) Ltd. | Point-of-Care Level 0 (L0) - Community; Level 1 (L1) | Ease of use | Not available |
| PQDx 0290-025-00 | FalciVax - Rapid test for Malaria Pv/Pf | 03.06.20 | Antigen test | Zephyr Biomedicals - A Division of Tulip Diagnostics (P) Ltd. | Level 0 (L0) - Community; Level 1 (L1) | Ease of use | Not available |
| PQDx 0382-117-00 | STANDARD Q HIV/Syphilis Combo Test | 26.05.20 | Antibody test | SD Biosensor Inc. | Level 0 (L0) - Community; Level 1 (L1) | Ease of use | Not available |
| PQDx 0348-117-00 | STANDARD Q Malaria P.f/P.v Ag Test | 06.03.20 | Antigen test | SD Biosensor Inc. | Level 0 (L0) - Community; Level 1 (L1) | Ease of use (no details described) | Not available |
| PQDx 0347-117-00 | STANDARD Q Malaria P.f/Pan Ag Test | 06.03.20 | Antigen test | SD Biosensor Inc. | Level 0 (L0) - Community; Level 1 (L1) | Ease of use (no details described) | Not available |
| PQDx 0346-117-00 | STANDARD Q Malaria P.f Ag Test | 06.03.20 | Antigen test | SD Biosensor, Inc | Level 1 (L1) - Primary Care; Level 0 (L0) - Community | Ease of use (no details described) | Not available |
| PQDx 0360-117-00 | STANDARD Q HCV Ab Test | 05.03.20 | Antibody test | SD Biosensor, Inc | Level 1 (L1) - Primary Care; Level 0 (L0) - Community | Ease of use | Not available |
| PQDx 0054-006-01 | SURE CHECK HIV Self-Test | 29.11.19 | Antibody test | Chembio Diagnostic Systems, Inc. | Self-Testing | Not available | Not available |
| PQDx 0363-010-00 | First Response HIV 1-2.O Card Test (Version 2.0) | 16.09.19 | Antibody test | Premier Medical Corporation Private Limited | Level 1 (L1) - Primary Care | Not available | Not available |
| PQDx 0451-013-00 | Determine HBsAg 2 | 02.09.19 | Antigen test | Abbott Diagnostics Medical Co. Ltd | Level 1 (L1) - Primary Care | Not available | Not available |
| PQDx 0320-090-00 | Mylan HIV Self Test | 03.07.19 | Antibody test | Atomo Diagnostics Ltd | Self-Testing | Not available | Not available |
| PQDx 0349-012-00 | NxTek Eliminate Malaria Pf | 12.04.19 | Antigen test | Abbott Diagnostics Korea Inc | Level 0 (L0) - Community | Not available | Not available |
| PQDx 0359-032-00 | m-PIMA HIV-1/2 VL | 08.04.19 | Molecular test | Abbott Rapid Diagnostics | Level 1 (L1) | Not available | Not available |
| PQDx 0283-010-00 | First Response Malaria Antigen P. falciparum (HRP2) Card Test | 04.12.18 | Antigen test | Premier Medical Corporation Limited | Level 0 (L0) - Community; Level 1 (L1) (In either laboratory and point of care settings) | Ease of use (no details described) | Not available |
| PQDx 0329-010-00 | First Response Malaria Ag. P.f. / P.v. Card Test | 04.12.18 | Antigen test | Premier Medical Corporation Limited | Level 0 (L0) - Community; Level 1 (L1) (in either laboratory or point of care settings) | Ease of use (no details described) | Not available |
| PQDx 0297-012-00 | Bioline Malaria Ag P.f/P.f/P.v | 04.12.18 | Antigen test | Abbott Diagnostics Korea Inc. | (intended for professional use) Level 1 (L1) | Not available | Not available |
| PQDx 0002-002-01 | INSTI HIV Self Test | 30.11.18 | Antibody test | bioLytical Laboratories Inc. | Self-Testing | Not available | Not available |
| PQDx 0294-074-00 | MERISCREEN Malaria Pf/Pv Ag | 09.11.18 | Antigen test | Meril Diagnostics Pvt. Ltd. | Level 0 (L0) - Community; Level 1 (L1) (in either laboratory or point-of-care settings) | Ease of use (no details described) | Not available |
| PQDx 0285-010-00 | First Response Malaria Ag. pLDH/HRP2 Combo Card Test | 04.12.18 | Antigen test | Premier Medical Corporation Limited | Level 0 (L0) - Community; Level 1 (L1) (in either laboratory or point-of-care settings) | Ease of use (no details described) | Not available |

Note: This table presents the first 30 dossiers extracted for analysis.

# **Supplementary Table S5.** List of included studies

| **Authors** | **Title** | **Journal** | **Year of publication** | **DOI** |
| --- | --- | --- | --- | --- |
| Maurice Kalande Amulundu | Cost-effectiveness analysis of DAT and rK39 as rapid diagnostic tests for Visceral Leishmaniasis in Wajir County-Kenya | Thesis for the School of Public Health University of Nairobi | 2013 |  |
| Atchison, C.; Pristerà, P.; Cooper, E.; Papageorgiou, V.; Redd, R.; Piggin, M.; Flower, B.; Fontana, G.; Satkunarajah, S.; Ashrafian, H.; Lawrence-Jones, A.; Naar, L.; Chigwende, J.; Gibbard, S.; Riley, S.; Darzi, A.; Elliott, P.; Ashby, D.; Barclay, W.; Cooke, G. S.; Ward, H.; | Usability and Acceptability of Home-based Self-testing for Severe Acute Respiratory Syndrome Coronavirus 2 (SARS-CoV-2) Antibodies for Population Surveillance | Clinical Infectious Diseases | 2021 | https://doi.org/10.1093/cid/ciaa1178 |
| Mohammed Majam, Alex E. Fischer, Naleni Rhagnath, Vanessa Msolomba, Willem D.F. Venter, Laura Mazzola, and Samanta T. Lalla-Edward | Performance assessment of four HIV self-test devices in South Africa: A cross-sectional study | South African Journal of Science | 2021 | https://doi.org/10.17159/sajs.2021/7738 |
| Lippman, Sheri A; Gilmore, Hailey J; Lane, Tim; Radebe, Oscar; Chen, Yea-Hung; Mlotshwa, Nkuli; Maleke, Kabelo; Manyuchi, Albert E; McIntyre, James; | Ability to use oral fluid and fingerstick HIV self-testing (HIVST) among South African MSM | PLoS One | 2018 | https://doi.org/10.1371/journal.pone.0206849 |
| Majam, M.; Mazzola, L.; Rhagnath, N.; Lalla-Edward, S. T.; Mahomed, R.; Venter, W. D. F.; Fischer, A. E.; | Usability assessment of seven HIV self-test devices conducted with lay-users in Johannesburg, South Africa | PLoS One | 2020 | https://doi.org/10.1371/journal.pone.0227198 |
| Majam, M.; Rhagnath, N.; Msolomba, V.; Singh, L.; Urdea, M. S.; Lalla-Edward, S. T.; | Assessment of the Sedia HIV Self-Test Device: Usability and Performance in the Hands of Untrained Users in Johannesburg, South Africa | Diagnostics (Basel) | 2021 | 10.3390/diagnostics11101816 |
| Balán, I. C.; Rios, J. L.; Lentz, C.; Arumugam, S.; Dolezal, C.; Kutner, B.; Rael, C. T.; Ying, A. W.; Macar, O. U.; Sia, S. K.; | Acceptability and Use of a Dual HIV/Syphilis Rapid Test and Accompanying Smartphone App to Facilitate Self- and Partner-Testing Among Cisgender Men and Transgender Women Who Have Sex with Men | AIDS and Behavior | 2022 | https://doi.org/10.1007/s10461-021-03322-9 |
| Donna M. Zucker, Akshaya Shanmugam | Hepatitis C Point-of-Care Testing in Vulnerable Populations | Gastroenterology Nursing | 2015 | 10.1097/SGA.0000000000000221 |
| Stephanie Zobrist, Michelle Oliveira-Silva, Alexia Martines Vieira, Pooja Bansil, Emily Gerth- Guyette, Brandon T Leader, Allison Golden, Hannah Slater, Catherine Duran de Lucena Cruz, Eduardo Garbin, Mariana Sagalovsky, Sampa Pal, Vin Gupta, Leo Wolansky, Deusilene Souza Vieira Dall’Acqua, Felipe Gomes Naveca, Valdinete Alves do Nascimento, Juan Miguel Villalobos Salcedo, Paul K Drain, Alexandre Dias Tavares Costa, Gonzalo J Domingo, Dhélio Pereira | Screening for SARS-CoV-2 in close contacts of individuals with confirmed infection: performance and operational considerations | The Journal of Infectious Diseases | 2022 | https://doi.org/10.1093/infdis/jiac204 |
| Beckham, S. W.; T, S. Karver; Mantsios, A.; Shembilu, C.; Donastorg, Y.; Perez, M.; Gomez, H.; Barrington, C.; Mwampashi, A.; Davis, W.; Likindikoki, S.; Mbwambo, J. K.; Kerrigan, D.; | Acceptability and perceptions of HIV oral self-testing across settings: A comparative qualitative study among Dominican and Tanzanian female sex workers | Global Public Health | 2022 | https://doi.org/10.1080/17441692.2021.1901129 |
| Ben Moussa, A.; Belhiba, O.; Hajouji, F. Z.; El Kettani, A.; Youbi, M.; Alami, K.; El Omari, B.; Ouarsas, L.; Karkouri, M.; | Acceptability and usability of oral fluid-based HIV self-testing among female sex workers and men who have sex with men in Morocco | BMC Public Health | 2022 | https://doi.org/10.1186/s12889-022-14632-5 |
| Adrian H. Zai, Molly Caffrey, Conor S. O’Brien, Dawei Jiang, Remona Kanyat, and Sara Silacci | The Implementation and Acceptability of a Combined Mobile Application with a COVID-19 at-Home Test Kit | Telemedicine and e-health | 2022 | https://doi.org/10.1089/tmj.2021.0487 |
| Wenqian Xu, Elena Ivanova Reipold, Peizhen Zhao, Weiming Tang, Joseph D. Tucker, Jason J. Ong, Jinshen Wang, Philippa Easterbrook, Cheryl Case Johnson, Muhammad S. Jamil and Cheng Wang | HCV Self-Testing to Expand Testing: A Pilot Among Men Who Have Sex With Men in China | Frontiers in public health | 2022 | https://doi.org/10.3389/fpubh.2022.903747 |
| Li Ping Wong, Narges Atefi and Sazaly AbuBakar | Nationwide study of factors associated with public’s willingness to use home self-test kit for dengue fever in Malaysia | BMC public health | 2016 | https://doi.org/10.1186/s12889-016-3409-y |
| Bocoum, F. Y.; Tarnagda, G.; Bationo, F.; Savadogo, J. R.; Nacro, S.; Kouanda, S.; Zarowsky, C.; | Introducing onsite antenatal syphilis screening in Burkina Faso: implementation and evaluation of a feasibility intervention tailored to a local context | BMC Health Services Research | 2017 | https://doi.org/10.1186/s12913-017-2325-x |
| N Amyai, KEA Darling, V D’Acremont, E Castro, S Ebert, M Monnat Diserens, J Perdrix, A Herard Fossati, P Bodenmann and M Cavassini | A prospective multicentre study of healthcare provider preference in rapid HIV testing kits: Determine versus INSTI | International journal of STD and AIDS | 2017 | 10.1177/0956462417717648 |
| Boehme, C. C.; Nabeta, P.; Henostroza, G.; Raqib, R.; Rahim, Z.; Gerhardt, M.; Sanga, E.; Hoelscher, M.; Notomi, T.; Hase, T.; Perkins, M. D.; | Operational feasibility of using loop-mediated isothermal amplification for diagnosis of pulmonary tuberculosis in microscopy centers of developing countries | Journal of clinical microbiology | 2007 | https://doi.org/10.1128/jcm.02352-06 |
| TC Witzel, A Bourne, FM Burns, AJ Rodger, L McCabe, MM Gabriel, M Gafos, D Ward, Y Collaco-Moraes, DT Dunn, A Speakman, C Bonell, R Pebody, FC Lampe, J Harbottle, AN Phillips, S McCormack and P Weatherburn | HIV self-testing intervention experiences and kit usability: results from a qualitative study among men who have sex with men in the SELPHI (Self-Testing Public Health Intervention) randomized controlled trial in England and Wales | HIV Medicine | 2020 | https://doi.org/10.1111/hiv.12818 |
| Kate S. Wilson, Cyrus Mugo, David A. Katz, Vivianne Manyeki, Carol Mungwala, Lilian Otiso, David Bukusi, R. Scott McClelland, Jane M. Simoni, Matt Driver, Sarah Masyuko, Irene Inwani, Pamela K. Kohler | High Acceptance and Completion of HIV Self‑testing Among Diverse Populations of Young People in Kenya Using a Community‑Based Distribution Strategy | AIDS and Behavior | 2022 | https://doi.org/10.1007/s10461-021-03451-1 |
| Yoshiyuki Watanabe, Ritsuko Oikawa, Toshio Suzuki, Hidemitsu Funabashi, Daisuke Asai, Yutaka Hatori, Hiromu Takemura, Hiroyuki Yamamoto, Fumio Itoh | Evaluation of a new point-of-care quantitative reverse transcription polymerase chain test for detecting severe acute respiratory syndrome coronavirus 2 | Journal of clinical laboratory analysis | 2021 | https://doi.org/10.1002/jcla.23992 |
| Bwana, P.; Ageng'o, J.; Danda, J.; Mbugua, J.; Handa, A.; Mwau, M.; | Performance and usability of mPIMA™ HIV 1/2 viral load test in point of care settings in Kenya | Journal of Clinical Virology | 2019 | https://doi.org/10.1016/j.jcv.2019.104202 |
| Bwana, P.; Ageng'o, J.; Mwau, M.; | Performance and usability of Cepheid GeneXpert HIV-1 qualitative and quantitative assay in Kenya | PLoS One | 2019 | https://doi.org/10.1371/journal.pone.0213865 |
| Bwana, P.; Ochieng, L.; Mwau, M.; | Performance and usability evaluation of the INSTI HIV self-test in Kenya for qualitative detection of antibodies to HIV | PLoS One | 2018 | https://doi.org/10.1371/journal.pone.0202491 |
| Cassuto, N. G.; Gravier, A.; Colin, M.; Theillay, A.; Pires-Roteira, D.; Pallay, S.; Serreau, R.; Hocqueloux, L.; Prazuck, T.; | Evaluation of a SARS-CoV-2 antigen-detecting rapid diagnostic test as a self-test: Diagnostic performance and usability | Journal of Medical Virology | 2021 | https://doi.org/10.1002/jmv.27249 |
| Colom-Cadena, A.; Martínez-Riveros, H.; Bordas, A.; Alonso-García, L.; Montoro-Fernández, M.; Romano-deGea, P.; Vidal-Alaball, J.; Solà-Segura, E.; Llibre, J. M.; Revollo, B.; Casabona, J.; Agustí, C.; | Feasibility of severe acute respiratory syndrome coronavirus 2 (SARS-CoV-2) antigen self-testing in school and summer camp attendees | Frontiers in Pediatrics | 2022 | https://doi.org/10.3389%2Ffped.2022.975454 |
| Gloria Wandera, Priska Bwana, and Matilu Mwau | Usability of HIV-1 Assay Using DBS for Early Infant Diagnosis in Field Settings in Kenya | American Association for Clinical Chemistry | 2022 | https://doi.org/10.1093/jalm/jfac026 |
| Ansbro É, M.; Gill, M. M.; Reynolds, J.; Shelley, K. D.; Strasser, S.; Sripipatana, T.; Tshaka Ncube, A.; Tembo Mumba, G.; Terris-Prestholt, F.; Peeling, R. W.; Mabey, D. | Introduction of Syphilis Point-of-Care Tests, from Pilot Study to National Programme Implementation in Zambia: A Qualitative Study of Healthcare Workers' Perspectives on Testing, Training and Quality Assurance | PLoS One | 2015 | https://doi.org/10.1371/journal.pone.0127728 |
| Liesbeth Van Wesenbeeck, Hanne Meeuws, Andrea Van Immerseel, Gabriela Ispas, Kristiane Schmidt, Lieselot Houspie, Marc Van Ranst, Lieven Stuyver | Comparison of the FilmArray RP, Verigene RV+, and Prodesse ProFLU+/FAST+ Multiplex Platforms for Detection of Influenza Viruses in Clinical Samples from the 2011-2012 Influenza Season in Belgium | Journal of Clinical Microbiology | 2013 | 10.1128/JCM.00911-13 |
| Creswell, Jacob; Codlin, Andrew J; Andre, Emmanuel; Micek, Mark A; Bedru, Ahmed; Carter, E Jane; Yadav, Rajendra-Prasad; Mosneaga, Andrei; Rai, Bishwa; Banu, Sayera; | Results from early programmatic implementation of Xpert MTB/RIF testing in nine countries | BMC infectious diseases | 2014 | https://doi.org/10.1186/1471-2334-14-2 |
| Shannen M. C. van Duijn, Angela K. Siteyi, Sherzel Smith, Emmanuel Milimo, Leon Stijvers, Monica Oguttu, Michael O. Amollo, Edward O. Okeyo, Lilyana Dayo, Titus Kwambai, Dickens Onyango and Tobias F. Rinke de Wit | Connected diagnostics to improve accurate diagnosis, treatment, and conditional payment of malaria services in Kenya | BMC medical informatics and decision making | 2021 | https://doi.org/10.1186/s12911-021-01600-z |
| Rafael Van den Bergh, Pascale Chaillet, Mamadou Saliou Sow, Mathieu Amand, Charlotte van Vyve, Sylvie Jonckheere, Rosa Crestani, Armand Sprecher, Michel Van Herp, Arlene Chua, Erwan Piriou, Lamine Koivogui, Annick Antierens | Feasibility of Xpert Ebola Assay in Médecins Sans Frontières Ebola Program, Guinea | Emerging Infectious Diseases | 2016 | 10.3201/eid2202.151238 |
| Waimar Tun, Lung Vu, Osasuyi Dirisu, Adekemi Sekoni, Elizabeth Shoyemi, Jean Njab, Sade Ogunsola and Sylvia Adebajo | Uptake of HIV self-testing and linkage to treatment among men who have sex with men (MSM) in Nigeria: A pilot programme using key opinion leaders to reach MSM | Journal of the International AIDS Society | 2018 | https://doi.org/10.1002/jia2.25124 |
| Davies, B.; Araghi, M.; Moshe, M.; Gao, H.; Bennet, K.; Jenkins, J.; Atchison, C.; Darzi, A.; Ashby, D.; Riley, S.; Barclay, W.; Elliott, P.; Ward, H.; Cooke, G.; | Acceptability, Usability, and Performance of Lateral Flow Immunoassay Tests for Severe Acute Respiratory Syndrome Coronavirus 2 Antibodies: REACT-2 Study of Self-Testing in Non-healthcare Key Workers | Open Forum Infectious Diseases | 2021 | https://doi.org/10.1093/ofid/ofab496 |
| de Vos, Lindsey; Daniels, Joseph; Gebengu, Avuyonke; Mazzola, Laura; Gleeson, Birgitta; Piton, Jérémie; Mdingi, Mandisa; Gigi, Ranjana; Ferreyra, Cecilia; Klausner, Jeffrey D; | Usability of a novel lateral flow assay for the point-of-care detection of Neisseria gonorrhoeae: A qualitative time-series assessment among healthcare workers in South Africa | Plos one | 2023 | https://doi.org/10.1371/journal.pone.0286666 |
| Diaz, John; Gusto, Cody; McCoy, Kaci; Silvert, Colby; Bala, Joseph A; Atibu, Joseph; Tshefu, Antoinette; Mwandagalirwa, Melchior; Dinglasan, Rhoel R; | A mixed methods study assessing the adoption potential of a saliva-based malaria rapid test in the Democratic Republic of Congo | Malaria Journal | 2023 | https://doi.org/10.1186/s12936-023-04599-y |
| Dieye, Y.; Storey, H. L.; Barrett, K. L.; Gerth-Guyette, E.; Di Giorgio, L.; Golden, A.; Faulx, D.; Kalnoky, M.; Ndiaye, M. K. N.; Sy, N.; Mané, M.; Faye, B.; Sarr, M.; Dioukhane, E. M.; Peck, R. B.; Guinot, P.; de Los Santos, T.; | Feasibility of utilizing the SD BIOLINE Onchocerciasis IgG4 rapid test in onchocerciasis surveillance in Senegal | PLOS Neglected Tropical Diseases | 2017 | <https://doi.org/10.1371/journal.pntd.0005884> |
| Bianca A. Trombetta, Savannah E. Kandigian, Robert R. Kitchen, Korneel Grauwet, Pia Kivisäkk Webb, Glenn A. Miller, Charles G. Jennings, Sejal Jain, Samara Miller, Yikai Kuo, Thadryan Sweeney, Tal Gilboa, Maia Norman, Daimon P. Simmons, Christopher E. Ramirez, Melissa Bedard, Catherine Fink, Jina Ko, Esmarline J. De León Peralta, et al. | Evaluation of serological lateral flow assays for severe acute respiratory syndrome coronavirus-2 | BMC infectious diseases | 2021 | https://doi.org/10.1186/s12879-021-06257-7 |
| Ashton, R. A.; Kefyalew, T.; Tesfaye, G.; Counihan, H.; Yadeta, D.; Cundill, B.; Reithinger, R.; Kolaczinski, J. H. | Performance of three multi-species rapid diagnostic tests for diagnosis of Plasmodium falciparum and Plasmodium vivax malaria in Oromia Regional State, Ethiopia | Malaria Journal | 2010 | https://doi.org/10.1186/1475-2875-9-297 |
| Serge Tonen-Wolyec, Jérémie Muwonga Masidi, Luc Ferdinand Kamanga Lukusa, Gaetan Nsiku Dikumbwa, Angèle Sarassoro, and Laurent Bélec | Analytical Performance of the Exacto Test HIV Self-Test: A Cross-Sectional Field Study in the Democratic Republic of the Congo | Open Forum Infectious Diseases | 2020 | 10.1093/ofid/ofaa554 |
| Fajardo, E.; Watson, V.; Kumwenda, M.; Usharidze, D.; Gogochashvili, S.; Kakhaberi, D.; Giguashvili, A.; Johnson, C. C.; Jamil, M. S.; Dacombe, R.; Stvilia, K.; Easterbrook, P.; Ivanova Reipold, E.; | Usability and acceptability of oral-based HCV self-testing among key populations: a mixed-methods evaluation in Tbilisi, Georgia | BMC Infectious Diseases | 2022 | https://doi.org/10.1186/s12879-022-07484-2 |
| Fitoussi, F.; Dupont, R.; Tonen-Wolyec, S.; Bélec, L.; | Performances of the VitaPCR™ SARS-CoV-2 Assay during the second wave of the COVID-19 epidemic in France | Journal of Medical Virology | 2021 | https://doi.org/10.1002%2Fjmv.26950 |
| Serge Tonen-Wolyec, Raphael Dupont, Salomon Batina-Agasa, Marie-Pierre Hayette, Laurent Belec | Capillary whole-blood IgG-IgM COVID-19 selftest as a serological screening tool for SARSCoV-2 infection adapted to the general public | Plos One | 2020 | https://doi.org/10.1371/journal.pone.0240779 |
| Serge Tonen-Wolyec, Raphaël Dupont, Natalio Awaida, Salomon Batina-Agasa, Marie-Pierre Hayette and Laurent Bélec | Evaluation of the Practicability of Biosynex Antigen Self-Test COVID-19 AG+ for the Detection of SARS-CoV-2 Nucleocapsid Protein from Self-Collected Nasal Mid-Turbinate Secretions in the General Public in France | Diagnostics | 2021 | https://doi.org/10.3390/diagnostics11122217 |
| Serge Tonen-Wolyec, Roland Marini Djang’eing’a, Salomon Batina-Agasa, Charles Kayembe Tshilumba, Jeremie Muwonga Masidi, Marie-Pierre Hayette, Laurent Belec | Self-testing for HIV, HBV, and HCV using finger-stick whole-blood multiplex immunochromatographic rapid test: A pilot feasibility study in sub-Saharan Africa | Plos One | 2021 | https://doi.org/10.1371/journal.pone.0249701 |
| Kim-Kee Tan, Noor Syahida Azizan, Che Norainon Yaacob, Nurul Asma Anati Che Mat Seri, Nur Izyan Samsudin, Boon-Teong Teoh, Sing-Sin Sam and Sazaly AbuBakar | Operational utility of the reversetranscription recombinase polymerase amplification for detection of dengue virus | BMC Infectious Diseases | 2018 | https://doi.org/10.1186/s12879-018-3065-1 |
| Laura E Strong; Irene Middendorf; Michelle Turner; David K Edwards V; Varun Sama; Joshua Mou; K Colleen Adams | Usability of an At-Home Anterior Nares SARS-CoV-2 RT-PCR Sample Collection Kit: Human Factors Feasibility Study | JMIR human factors | 2021 | 10.2196/29234 |
| Clarisse Sri-Pathmanathan, Definate Nhamo, Takudzwa Mamvuto, Gwendoline Chapwanya, Fern Terris-Prestholt, Imelda Mahaka, Michael Marks , Joseph D Tucker | Syphilis self-testing to expand test uptake among men who have sex with men: a theoretically informed mixed methods study in Zimbabwe | Sexually Transmitted Infections | 2021 | http://dx.doi.org/10.1136/sextrans-2020-054911 |
| Fogg, C.; Twesigye, R.; Batwala, V.; Piola, P.; Nabasumba, C.; Kiguli, J.; Mutebi, F.; Hook, C.; Guillerm, M.; Moody, A.; Guthmann, J. P.; | Assessment of three new parasite lactate dehydrogenase (pan-pLDH) tests for diagnosis of uncomplicated malaria | Transactions of the Royal Society of Tropical Medicine and Hygiene | 2008 | 10.1016/j.trstmh.2007.09.014. |
| Achenbach, C. J.; Caputo, M.; Hawkins, C.; Balmert, L. C.; Qi, C.; Odorisio, J.; Dembele, E.; Jackson, A.; Abbas, H.; Frediani, J. K.; Levy, J. M.; Rebolledo, P. A.; Kempker, R. R.; Esper, A. M.; Lam, W. A.; Martin, G. S.; Murphy, R. L.; | Clinical evaluation of the Diagnostic Analyzer for Selective Hybridization (DASH): A point-of-care PCR test for rapid detection of SARS-CoV-2 infection | PLoS One | 2022 | https://doi.org/10.1371/journal.pone.0270060.g001 |
| Frediani, J. K.; Levy, J. M.; Rao, A.; Bassit, L.; Figueroa, J.; Vos, M. B.; Wood, A.; Jerris, R.; Van, Leung-Pineda; Gonzalez, M. D.; Rogers, B. B.; Mavigner, M.; Schinazi, R. F.; Schoof, N.; Waggoner, J. J.; Kempker, R. R.; Rebolledo, P. A.; O'Neal, J. W.; Stone, C.; Chahroudi, A.; Morris, C. R.; Suessmith, A.; Sullivan, J.; Farmer, S.; Foster, A.; Roback, J. D.; Ramachandra, T.; Washington, C.; Le, K.; Cordero, M. C.; Esper, A.; Nehl, E. J.; Wang, Y. F.; Tyburski, E. A.; Martin, G. S.; Lam, W. A.; | Multidisciplinary assessment of the Abbott BinaxNOW SARS-CoV-2 point-of-care antigen test in the context of emerging viral variants and self-administration | Scientific reports | 2021 | https://doi.org/10.1038/s41598-021-94055-1 |
| Galli, R. A.; Lo Hog Tian, J. M.; Sumner-Williams, M.; McBain, K.; Stanizai, E.; Tharao, W.; Aden, M.; Jamieson, H.; Da Silva, M.; Vassal, A. F.; Guilbault, L.; Ireland, L.; Witges, K.; King, A.; Ametepee, K.; Lachowsky, N. J.; Pant Pai, N.; Mazzulli, T.; Rourke, S. B.; | An observed, prospective field study to evaluate the performance and acceptance of a blood-based HIV self-test in Canada | BMC Public Health | 2021 | https://doi.org/10.1186/s12889-021-11418-z |
| Grésenguet, G.; Longo, J. D.; Tonen-Wolyec, S.; Mboumba Bouassa, R. S.; Belec, L.; | Acceptability and Usability Evaluation of Finger-Stick Whole Blood HIV Self-Test as An HIV Screening Tool Adapted to The General Public in The Central African Republic | The Open AIDS Journal | 2017 | doi: 10.2174/1874613601711010101. eCollection 2017. |
| Guise, A.; Witzel, T. C.; Mandal, S.; Sabin, C.; Rhodes, T.; Nardone, A.; Harris, M.; | A qualitative assessment of the acceptability of hepatitis C remote self-testing and self-sampling amongst people who use drugs in London, UK | BMC Infectious Diseases | 2018 | https://doi.org/10.1186%2Fs12879-018-3185-7 |
| Guthmann, J. P.; Ruiz, A.; Priotto, G.; Kiguli, J.; Bonte, L.; Legros, D.; | Validity, reliability and ease of use in the field of five rapid tests for the diagnosis of Plasmodium falciparum malaria in Uganda | Transactions of The Royal Society of Tropical Medicine and Hygiene | 2002 | https://doi.org/10.1016/s0035-9203(02)90091-x |
| Hahn, M.; Olsen, A.; Stokes, K.; Fowler, R. C.; Gu, R.; Semple-Lytch, S.; DeVito, A.; Kurpiel, P.; Hughes, S.; Rakeman, J. L.; | Use, Safety Assessment, and Implementation of Two Point-of-Care Tests for COVID-19 Testing | American Journal of Clinical Pathology | 2021 | doi: 10.1093/ajcp/aqab081 |
| David O. Soti, Stephen N. Kinoti, Ahmeddin H. Omar, John Logedi, Teresa K. Mwendwa, Zahra Hirji and Santiago Ferro | Feasibility of an innovative electronic mobile system to assist health workers to collect accurate, complete and timely data in a malaria control programme in a remote setting in Kenya | Malaria Journal | 2015 | 10.1186/s12936-015-0965-z |
| Daniela Cristina Soares, Luciano Chaves Franco Filho, Herald Souza dos Reis, Yan Corrêa Rodrigues, Felipe Bonfim Freitas, Cintya de Oliveira Souza, Giseli Nogueira Damacena, Nazle Mendonça Collaço Véras, Pamela Cristina Gaspar, Adele Schwartz Benzaken, Joana da Felicidade Ribeiro Favacho, Olinda Macedo and Maria Luiza Bazzo | Assessment of the Accuracy, Usability and Acceptability of a Rapid Test for the Simultaneous Diagnosis of Syphilis and HIV Infection in a Real-Life Scenario in the Amazon Region, Brazil | Diagnostics | 2023 | https://doi.org/10.3390/diagnostics13040810 |
| Philip Smith, Melissa Wallace and Linda-Gail Bekker | Adolescents’ experience of a rapid HIV self-testing device in youth-friendly clinic settings in Cape Town South Africa: a cross-sectional community based usability study | Journal of the International AIDS Society | 2016 | http://dx.doi.org/10.7448/IAS.19.1.21111 |
| Bashar S.Shihabuddina, MatthewL.Faron, RyanF.Relich, PaulVanHeukelom, Donna Mayne, Mary Allen Staat, Rangaraj Selvarangan, Leslie A. Hueschen, Donna M. Wolki, Stacey House, Glenn Harnett, Kevin McGann, Mark T. Steele, Jose R. Romero, Joe Arms, Owen Lander, Michael Loeffelholz, Fiona Strouts, Daniel Cohen | Cepheid Xpert Xpress Flu/RSV evaluation performed by minimally trained non-laboratory operators in a CLIA-waived environment | Diagnostic Microbiology and Infectious Disease | 2022 | https://doi.org/10.1016/j.diagmicrobio.2022.115764 |
| Adella, Fidelis Jacklyn; Vanna, Moul; Adhikari, Bipin; Ol, Sam; Tripura, Rupam; Davoeung, Chan; Callery, James J; Sovann, Yok; Chandna, Arjun; Bunreth, Voeunrung; | The feasibility of novel point-of-care diagnostics for febrile illnesses at health centres in Southeast Asia: a mixed-methods study | Transactions of The Royal Society of Tropical Medicine and Hygiene | 2023 | https://doi.org/10.1093/trstmh/trad036 |
| Harichund, C.; Kunene, P.; Moshabela, M.; | Feasibility of HIV self-testing: experiences of people seeking HIV testing in rural and urban KwaZulu-Natal, South Africa | African Journal of AIDS Research | 2019 | https://doi.org/10.2989/16085906.2019.1621358 |
| Osama M. E. Seidahmed, Muneir M. N. Mohamedein, Afrah A. Elsir, Fayez T. Ali, El Fatih M. Malik and Eldirdieri S. Ahmed | End-user errors in applying two malaria rapid diagnostic tests in a remote area of Sudan | Tropical Medicine and International Health | 2008 | 10.1111/j.1365-3156.2008.02015.x |
| Harris, J. R.; Cavallaro, E. C.; de Nobrega, A. A.; Barrado, Jcbd; Bopp, C.; Parsons, M. B.; Djalo, D.; Fonseca, F. G. D.; Ba, U.; Semedo, A.; Sobel, J.; Mintz, E. D.; | Field evaluation of Crystal VC (R) Rapid Dipstick test for cholera during a cholera outbreak in Guinea-Bissau | Tropical Medicine & International Health | 2009 | https://doi.org/10.1111/j.1365-3156.2009.02335.x |
| Hawash, Y.; Jaafer, N.; Alpakistany, T.; | Ease of use and validity testing of a point-of-care fast test for parasitic vaginosis self-diagnosis | Tropical biomedicine | 2021 | https://doi.org/10.47665/tb.38.4.094 |
| Hawkes, M.; Katsuva, J. P.; Masumbuko, C. K.; | Use and limitations of malaria rapid diagnostic testing by community health workers in war-torn Democratic Republic of Congo | Malaria Journal | 2009 | https://doi.org/10.1186/1475-2875-8-308 |
| Herbert, Carly; Broach, John; Heetderks, William; Qashu, Felicia; Gibson, Laura; Pretz, Caitlin; Woods, Kelsey; Kheterpal, Vik; Suvarna, Thejas; Nowak, Christopher; | Feasibility of At-Home Serial Testing Using Over-the-Counter SARS-CoV-2 Tests With a Digital Smartphone App for Assistance: Longitudinal Cohort Study | JMIR formative research | 2022 | http://dx.doi.org/10.2196/35426 |
| Kisa Rose, Joseph KB Matovu, Caroline J Vrana-Diaz, Esther Buregyeya, Joseph Kagaayi, Harriet Chemusto, Shaban Mugerwa, William Musoke, Christopher S Mukama, Angela M Malek, Jeffrey E Korte and Rhoda K Wanyenze | Ease of understanding and performing HIV self-tests by pregnant women and their male partners in Uganda: a cross-sectional study | International journal of STDS and AIDS | 2021 | https://doi.org/10.1177/0956462420983935 |
| Paul Roddy, Javier Goiri, Laurence Flevaud, Pedro Pablo Palma, Silvia Morote, Nines Lima, Luis Villa, Faustino Torrico, and Pedro Albajar-Viñas | Field Evaluation of a Rapid Immunochromatographic Assay for Detection of Trypanosoma cruzi Infection by Use of Whole Blood | Journal of clinical microbiology | 2008 | 10.1128/JCM.02303-07 |
| Tiarney D. Ritchwood, Amanda Selin, Audrey Pettifor, Sheri A. Lippman, Hailey Gilmore, Linda Kimaru, Jennifer Hove, Ryan Wagner, Rhian Twine and Kathleen Kahn | HIV self-testing: South African young adults’ recommendations for ease of use, test kit contents, accessibility, and supportive resources | BMC Public Health | 2019 | https://doi.org/10.1186/s12889-019-6402-4 |
| Elena Ivanova Reipold, Ahmed Farahat, Amira Elbeeh, Reham Soliman, Elkin Bermudez Aza, Muhammad S. Jamil, Cheryl Case Johnson, Gamal Shiha and Philippa Easterbrook | Usability and acceptability of self-testing for hepatitis C virus infection among the general population in the Nile Delta region of Egypt | BMC Public Health | 2021 | https://doi.org/10.1186/s12889-021-11169-x |
| Agot, K.; Cain, M.; Medley, A.; Kimani, J.; Gichangi, P.; Kiio, C.; Mukiri, E.; Odonde, P.; Toroitich-Ruto, C.; Bingham, T.; Downer, M.; Chesang, K.; | Formative assessment to identify perceived benefits and barriers of HIV oral self-testing among female sex workers, service providers, outreach workers, and peer educators to inform scale-up in Kenya | AIDS Care | 2022 | https://doi.org/10.1080/09540121.2021.1894318 |
| Thierry Prazuck, Anne Gravier, Daniela Pires‐Roteira, Aurelie Theillay, Sandra Pallay, Mathilda Colin, Raphael Serreau, Laurent Hocqueloux, Nino Guy Cassuto | Evaluation of a new “all in one” SARS‐CoV‐2 antigen‐detecting rapid diagnostic test and self‐test: Diagnostic performance and usability in child and adult populations | Journal of medical virology | 2022 | https://doi.org/10.1002/jmv.27812 |
| Ivanova Reipold, E.; Fajardo, E.; Juma, E.; Bukusi, D.; Bermudez Aza, E.; Jamil, M. S.; Johnson, C. C.; Farquhar, C.; Easterbrook, P.; Monroe-Wise, A.; | Usability and acceptability of oral fluid hepatitis C self-testing among people who inject drugs in Coastal Kenya: a cross-sectional pilot study | BMC Infectious Diseases | 2022 | 10.1186/s12879-022-07712-9 |
| Nicholas C. Peiper, Steve Shamblen, Adam Gilbertson, Greg Guest, Michael Kopp, Laura Guy, Michelle R. Rose | Acceptability of a HIV self-testing program among people who use illicit drugs | International Journal of Drug Policy | 2022 | https://doi.org/10.1016/j.drugpo.2022.103613 |
| Jewett, A.; Al-Tayyib, A. A.; Ginnett, L.; Smith, B. D.; | Successful Integration of Hepatitis C Virus Point-of-Care Tests into the Denver Metro Health Clinic | AIDS Research and Treatment | 2013 | 10.1155/2013/528904 |
| Roger B. Peck, Jeanette M. Lim, Heidi van Rooyen, Wanjiru Mukoma, Lignet Chepuka, Pooja Bansil, Lucia C. Knight, Nelly Muturi, Ellen Chirwa, Arthur M. Lee, Jeff D. Wellhausen, Olivia Tulloch, Miriam Taegtmeyer | What Should the Ideal HIV Self-Test Look Like? A Usability Study of Test Prototypes in Unsupervised HIV Self-Testing in Kenya, Malawi, and South Africa | AIDS behavior | 2014 | 10.1007/s10461-014-0818-8 |
| Nuttada Panpradist, Enos C. Kline, Robert G. Atkinson, Michael Roller, Qin Wang, Ian T. Hull, Jack H. Kotnik, Amy K. Oreskovic, Crissa Bennett, Daniel Leon, Victoria Lyon, Shane D. Gilligan-Steinberg, Peter D. Han, Paul K. Drain, Lea M. Starita, Matthew J. Thompson, Barry R. Lutz | Harmony COVID-19: A ready-to-use kit, low-cost detector, and smartphone app for point-of-care SARS-CoV-2 RNA detection | Science Advances | 2021 | https://www.science.org/doi/10.1126/sciadv.abj1281 |
| Jing, Min; Bond, Raymond; Robertson, Louise J; Moore, Julie; Kowalczyk, Amanda; Price, Ruth; Burns, William; Nesbit, M Andrew; McLaughlin, James; Moore, Tara; | User experience analysis of AbC-19 Rapid Test via lateral flow immunoassays for self-administrated SARS-CoV-2 antibody testing | Scientific Reports | 2021 | https://doi.org/10.1038/s41598-021-93262-0 |
| Bilgin Osmanodja, Klemens Budde, Daniel Zickler, Marcel G. Naik, Jörg Hofmann, Maximilian Gertler, Claudia Hülso, Heike Rössig, Philipp Horn, Joachim Seybold, Stephanie Lunow, Melanie Bothmann, Astrid Barrera-Pesek and Manuel Mayrdorfer | Accuracy of a Novel SARS-CoV-2 Antigen-Detecting Rapid Diagnostic Test from Standardized Self-Collected Anterior Nasal Swabs | Journal of Clinical Medicine | 2021 | https://doi.org/10.3390/jcm10102099 |
| Kawser, Z.; Hossain, M.; Suliman, S.; Lockman, S.; Gitaka, J.; Bandawe, G.; Rahmat, R.; Hasan, I.; Siddik, A. B.; Afrad, M. H.; Rahman, M. Z.; Miller, G.; Walt, D. R.; Ivers, L. C.; LaRocque, R. C.; Harris, J. B.; Qadri, F.; | An Assessment of a Rapid SARS-CoV-2 Antigen Test in Bangladesh | The American Journal of Tropical Medicine and Hygiene | 2022 | 10.4269/ajtmh.22-0068. |
| Kim, S.; Nhem, S.; Dourng, D.; Ménard, D.; | Malaria rapid diagnostic test as point-of-care test: study protocol for evaluating the VIKIA Malaria Ag Pf/Pan | Malaria Journal | 2015 | 10.1186/s12936-015-0633-3 |
| Agustí, C.; Martínez-Riveros, H.; González, V.; Fernández-Rivas, G.; Díaz, Y.; Montoro-Fernandez, M.; Moreno-Fornés, S.; Romano-deGea, P.; Muntada, E.; Calvo, B.; Casabona, J.; | Feasibility of an online antigen self-testing strategy for SARS-CoV-2 addressed to health care and education professionals in Catalonia (Spain). The TESTA'T- COVID Project | PLoS One | 2022 | https://doi.org/10.1371/journal.pone.0275006 |
| Robert J. O’Connell, Robert G. Gates, Christian T. Bautista, Michelle Imbach, John C. Eggleston, Stephen G. Beardsley, Mark M. Manak, Richard Gonzales, Francisco J. Rentas, VictorW. Macdonald, Lisa J. Cardo, David T. Reiber, Susan L. Stramer, Nelson L. Michael, and Sheila A. Peel | Laboratory evaluation of rapid test kits to detect hepatitis C antibody for use in predonation screening in emergency settings | The journal of AABB Transfusion | 2012 | https://doi.org/10.1111/j.1537-2995.2012.03770.x |
| Maggie Nyirenda-Nyang’wa | Evaluation of Diagnostic Tests for HIV Detection in Children in Malawi | Thesis submitted for the degree of Doctor of Philosophy | 2023 |  |
| Samah Nour, Yu-Hsiang Hsieh, Richard E. Rothman, Mary Jett-Goheen, Ophelia Langhorne, Lan Wu, Stephen Peterson, and Charlotte A. Gaydos | Patients Can Accurately Perform Their Own Rapid HIV Point-of-Care Test in the Emergency Department | Point of Care | 2012 | 10.1097/POC.0b013e3182666eb7 |
| Knight, L.; Makusha, T.; Lim, J.; Peck, R.; Taegtmeyer, M.; van Rooyen, H.; | "I think it is right": a qualitative exploration of the acceptability and desired future use of oral swab and finger-prick HIV self-tests by lay users in KwaZulu-Natal, South Africa | BMC Research Notes | 2017 | 10.1186/s13104-017-2810-7 |
| Krüger, L. J.; Gaeddert, M.; Tobian, F.; Lainati, F.; Gottschalk, C.; Klein, J. A. F.; Schnitzler, P.; Kräusslich, H. G.; Nikolai, O.; Lindner, A. K.; Mockenhaupt, F. P.; Seybold, J.; Corman, V. M.; Drosten, C.; Pollock, N. R.; Knorr, B.; Welker, A.; de Vos, M.; Sacks, J. A.; Denkinger, C. M.; | The Abbott PanBio WHO emergency use listed, rapid, antigen-detecting point-of-care diagnostic test for SARS-CoV-2-Evaluation of the accuracy and ease-of-use | PLoS One | 2021 | https://doi.org/10.1371/journal.pone.0247918 |
| Linh Thuy Nguyen, Van Thi Thuy Nguyen, Kim Anh Le Ai, Minh Binh Truong, Tam Thi Minh Tran, Muhammad S. Jamil, Cheryl Johnson, Elena Ivanova Reipold, Philippa Easterbrook and Kidong Park | Acceptability and Usability of HCV Self-Testing in High Risk Populations in Vietnam | Diagnostics | 2021 | https://doi.org/10.3390/diagnostics11020377 |
| Krüger, L. J.; Klein, J. A. F.; Tobian, F.; Gaeddert, M.; Lainati, F.; Klemm, S.; Schnitzler, P.; Bartenschlager, R.; Cerikan, B.; Neufeldt, C. J.; Nikolai, O.; Lindner, A. K.; Mockenhaupt, F. P.; Seybold, J.; Jones, T. C.; Corman, V. M.; Pollock, N. R.; Knorr, B.; Welker, A.; de Vos, M.; Sacks, J. A.; Denkinger, C. M.; | Evaluation of accuracy, exclusivity, limit-of-detection and ease-of-use of LumiraDx™: An antigen-detecting point-of-care device for SARS-CoV-2 | Infection | 2022 | https://doi.org/10.1007/s15010-021-01681-y |
| Krüger, L. J.; Lindner, A. K.; Gaeddert, M.; Tobian, F.; Klein, J.; Steinke, S.; Lainati, F.; Schnitzler, P.; Nikolai, O.; Mockenhaupt, F. P.; Seybold, J.; Corman, V. M.; Jones, T. C.; Pollock, N. R.; Knorr, B.; Welker, A.; Weber, S.; Sethurarnan, N.; Swaminathan, J.; Solomon, H.; Padmanaban, A.; Thirunarayan, M.; L, P.; de Vos, M.; Ongarello, S.; Sacks, J. A.; Escadafal, C.; Denkinger, C. M.; | A Multicenter Clinical Diagnostic Accuracy Study of SureStatus, an Affordable, WHO Emergency Use-Listed, Rapid, Point-Of-Care Antigen-Detecting Diagnostic Test for SARS-CoV-2 | Microbiology Spectrum | 2022 | https://doi.org/10.1128/spectrum.01229-22 |
| Zibusiso Ndlovu, Lamin Massaquoi, Ndim Eugene Bangwen, John N. Batumba, Rachelle U. Bora, Joelle Mbuaya, Roger Nzadi, Nadine Ntabugi, Patrick Kisaka, Gisele Manciya, Ramzia Moudashirou, Harry Pangani, Patrick Mangochi, Roberta Makoko, David Van Laeken, Claude Kwitonda, Yuster Ronoh, Kuziwa Kuwenyi, Reinaldo Ortuno, Douglas Mangwanya, Edmore Zvidzai, Tapiwa Mupepe, Sekesai Zinyowera, Emmanuel Fajardo, Tom Ellman | Diagnostic performance and usability of the VISITECT CD4 semi-quantitative test for advanced HIV disease screening | Plos ONE | 2020 | https://doi.org/10.1371/journal.pone.0230453 |
| Samiksha Nayak, Tiffany Guo, Javier Lopez-Rios, Cody Lentz, Siddarth Arumugam, Joshua Hughes, Curtis Dolezal, Vincent Linder, Alex Carballo-Diéguez, Iván C. Balán and Samuel K. Sia | Integrating user behavior with engineering design of point-of-care diagnostic devices: theoretical framework and empirical findings | The Royal Society of Chemistry | 2019 | 10.1039/c9lc00188c |
| Ahmed, Rukhsana; Levy, Elvira I; Maratina, Sylvia S; de Jong, Judith J; Asih, Puji; Rozi, Ismail E; Hawley, William; Syafruddin, Din; ter Kuile, Feiko; | Performance of four HRP-2/pLDH combination rapid diagnostic tests and field microscopy as screening tests for malaria in pregnancy in Indonesia: a cross-sectional study | Malaria Journal | 2015 | https://doi.org/10.1186/s12936-015-0943-5 |
| Krüger, L. J.; Tanuri, A.; Lindner, A. K.; Gaeddert, M.; Köppel, L.; Tobian, F.; Brümmer, L. E.; Klein, J. A. F.; Lainati, F.; Schnitzler, P.; Nikolai, O.; Mockenhaupt, F. P.; Seybold, J.; Corman, V. M.; Jones, T. C.; Drosten, C.; Gottschalk, C.; Weber, S. F.; Weber, S.; Ferreira, O. C.; Mariani, D.; Dos Santos Nascimento, E. R.; Pereira Pinto Castineiras, T. M.; Galliez, R. M.; Faffe, D. S.; Leitão, I. C.; Dos Santos Rodrigues, C.; Frauches, T. S.; Nocchi, Kjcv; Feitosa, N. M.; Ribeiro, S. S.; Pollock, N. R.; Knorr, B.; Welker, A.; de Vos, M.; Sacks, J.; Ongarello, S.; Denkinger, C. M.; | Accuracy and ease-of-use of seven point-of-care SARS-CoV-2 antigen-detecting tests: A multi-centre clinical evaluation | EBioMedicine | 2022 | https://doi.org/10.1016/j.ebiom.2021.103774 |
| Tassaneewan Laksanasopin | Microfluidic-based Point-of-Care Testing for Global Health | Thesis | 2015 |  |
| Madalo Mukoka, Euphemia Sibanda, Constancia Watadzaushe, Moses Kumwenda, Florence Abok, Elizabeth L. Corbett, Elena Ivanova, Augustine Talumba Choko | COVID-19 self-testing using antigen rapid diagnostic tests: Feasibility evaluation among health-care workers and general population in Malawi | PLOS One | 2023 | https://doi.org/10.1371/journal.pone.0289291 |
| Chishimba Mubanga, Kabemba E. Mwape, Isaac K. Phiri, Chiara Trevisan, Mwemezi Kabululu, Gideon Zulu, Inge Van Damme, Veronika Schmidt, Pierre Dorny and Sarah Gabriël | Operational characteristics of an antibody detecting point of care test for Taenia solium infections in a community and hospital setting | BMC Infectious Diseases | 2021 | https://doi.org/10.1186/s12879-021-06320-3 |
| Devanand Moonasar | An evaluation of the performance and usage of leT Pf Malaria Rapid Diagnostic Test, in the Limpopo South Africa | PhD Thesis for the London School of Hygiene and Tropical Medicine | 2009 |  |
| Lasseter, G. M.; McNulty, C. A. M.; Hobbs, F. D. R.; Mant, D.; Little, P.; Investigators, Prism; | In vitro evaluation of five rapid antigen detection tests for group A beta-haemolytic streptococcal sore throat infections | Family Practice | 2009 | 10.1093/fampra/cmp054 |
| Lee, D. Y.; Ong, J. J.; Smith, K.; Jamil, M. S.; McIver, R.; Wigan, R.; Maddaford, K.; McNulty, A.; Kaldor, J. M.; Fairley, C. K.; Bavinton, B.; Chen, M.; Chow, E. P.; Grulich, A. E.; Holt, M.; Conway, D. P.; Stoove, M.; Wand, H.; Guy, R. J.; | The acceptability and usability of two HIV self-test kits among men who have sex with men: a randomised crossover trial | The Medical Journal of Australia | 2022 | https://doi.org/10.5694/mja2.51641 |
| Lindner, A. K.; Nikolai, O.; Rohardt, C.; Kausch, F.; Wintel, M.; Gertler, M.; Burock, S.; Hörig, M.; Bernhard, J.; Tobian, F.; Gaeddert, M.; Lainati, F.; Corman, V. M.; Jones, T. C.; Sacks, J. A.; Seybold, J.; Denkinger, C. M.; Mockenhaupt, F. P.; | Diagnostic accuracy and feasibility of patient self-testing with a SARS-CoV-2 antigen-detecting rapid test | Journal of Clinical Virology | 2021 | 10.1016/j.jcv.2021.104874 |
| Andrea Marchiol, Astrid Carolina Florez Sanchez, Andres Caicedo, Maryi Segura, Jessica Bautista, Martha Stella Ayala Sotelo, Rafael Herazo, Colin Forsyth, Laura C. Bohorquez | Laboratory evaluation of eleven rapid diagnostic tests for serological diagnosis of Chagas disease in Colombia | PLOS Neglected Tropical Diseases | 2023 | https://doi.org/10.1371/journal.pntd.0011547 |
| John D. Malone, Edith S. Smith, Jacqueline Sheffield, Darcel Bigelow, Kenneth C. Hyams, Stephen G. Beardsley, Richard S. Lewis, and Chester R. Roberts | Comparative evaluation of six rapid serological tests for HIV-1 antibody | Journal of acquired immune deficiency syndromes | 1993 |  |
